# Supplementary material
Source: PubMed Central journal article supplement (PMC2888148)

# Supplemental Figure 1

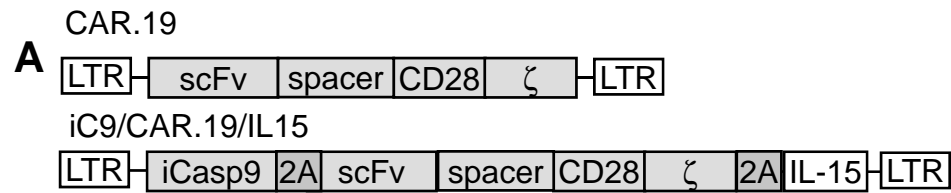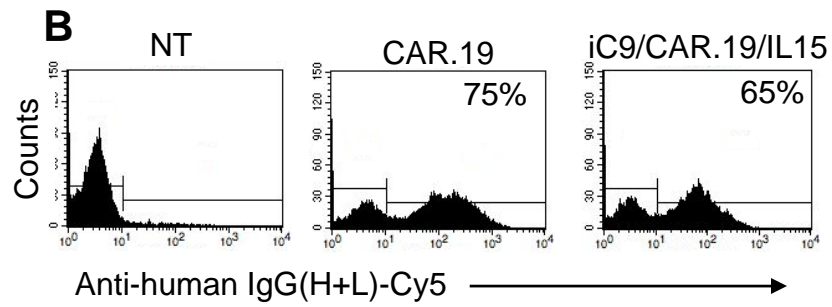

Supplement: NIHMS188481-supplement-1.pdf [file NIHMS188481-supplement-1.pdf]
